# Supplementary material for: Metformin inhibits ovarian granular cell pyroptosis through the miR-670-3p/NOX2/ROS pathway
Source: publisher site journal article supplement (doi:10.18632/aging.204745), 2023-05-25
Supplement: Supplementary file [file aging-v15i10-204745-supplementary-material-SD1.pdf]

## SUPPLEMENTARY TABLE

**Supplementary Table 1. The primer sequences used in RT-PCR.**

---

|            |                                                                                     |
|------------|-------------------------------------------------------------------------------------|
| miR-670-3p | Forward, 5'-CTGATCGTGAGGAGAGTGT-3';<br>Reverse, 5'-GGTCTTCGACATCGGGGCGG-3'          |
| NLRP3      | Forward, 5'-CAACCTCACGTCACACTGCT-3';<br>Reverse, 5'-TTTCAGACAACCCCAGGTTC-3'         |
| ASC        | Forward, 5'-CTGACGGATGAGCAGTACCA-3';<br>Reverse, 5'-CAGGATGATTTGGTGGGATT-3'         |
| Caspase-1  | Forward, 5'-TGTAATGAAGACTGCTACCTGGC-3';<br>Reverse, 5'-CCTTGTTTCTGAGGATGAAGGATGT-3' |
| GSDMD      | Forward, 5'-ATGGATGGGCAGATACAGGG-3';<br>Reverse, 5'-TGCTGCAGGACTTTGTGTTC-3'         |
| NOX2       | Forward, 5'-ACAAGGTTTATGACGATGAGCC-3';<br>Reverse, 5'-TTGAGCAACACGCACTGGAA-3'       |
| U6         | Forward, 5'-CGCTTCGGCAGCACATATAC-3';<br>Reverse, 5'-TTCACGAATTTGCGTGTCAT-3'         |
| GAPDH      | Forward, 5'-GGAGCGAGATCCCTCCAAAAT-3';<br>Reverse, 5'-GGCTGTTGTCATACTTCTCATGG-3'     |

---
